# Supplementary material
Source: PubMed Central journal article supplement (PMC4207999)
Supplement: supp_M114.601864_jbc.M114.601864-1.pdf [file supp_M114.601864_jbc.M114.601864-1.pdf]

**Supplemental mass-spectrometry data for “Cardiomyocyte specific loss of diacylglycerol acyl transferase 1 (DGAT1) reproduces the abnormalities in lipids found in severe heart failure”**

**Supplemental Methods**

*Liquid Chromatography Tandem Mass Spectrometry (LC/MS):* Lipid analyses by LC/MS were performed as described (1). Briefly, lipid extraction buffer was pre-cooled at 4°C. 0.25 mL of 0.1 M  $\text{KH}_2\text{PO}_4$  and 0.25 mL of 2-propanol were added to the weighed, frozen tissue aliquots (15-20 mg). 20  $\mu\text{L}$  of 50  $\mu\text{M}$  heptadecanoyl-CoA, dissolved in 0.1 M  $\text{KH}_2\text{PO}_4$ /2-propanol/acetonitrile (1:1: 2), was added per sample as internal control. The sample was homogenized with a bead beater (BioSpec). 30  $\mu\text{L}$  of saturated aqueous ammonium sulfate and 0.5 mL of acetonitrile were added to the homogenate and the mixture was vortexed well. After centrifugation at 2,500g for 10 min, the supernatant was transferred to MS vials for analyses. All analyses were carried out on a Waters Xevo TQ MS ACQUITY UPLC system (Waters) controlled by Mass Lynx Software 4.1 as described previously (2).

**Supplemental Table 1. Heart lipids from 10-month-old male mice (n=7, \*p<0.05, \*\*p<0.01)**

| A. Ceramides (pmol/mg tissue)       |                                    |                             |
|-------------------------------------|------------------------------------|-----------------------------|
|                                     | <i>Dgat1<sup>fllox/fllox</sup></i> | <i>hDgat1<sup>-/-</sup></i> |
| <b>Total</b>                        | <b>11.78±2.734</b>                 | <b>16.65±3.790</b>          |
| C14                                 | 0.031±0.007                        | 0.048±0.013                 |
| C16                                 | 5.15±1.44                          | 7.69±1.9*                   |
| C18                                 | 4.06±0.96                          | 5.36±1.19*                  |
| C18:1                               | 0.032±0.18                         | 0.47±0.17                   |
| C20                                 | 0.033±0.009                        | 0.066±0.026*                |
| C20:1                               | 0.027±0.007                        | 0.042±0.015*                |
| C22                                 | 0.059±0.025                        | 0.084±0.034                 |
| C22:1                               | 0.017±0.004                        | 0.0028±0.008**              |
| C24                                 | 1.334±0.255                        | 1.621±0.421                 |
| C24:1                               | 0.0595±0.127                       | 1.055±0.031**               |
| C26                                 | 0.054±0.010                        | 0.047±0.008                 |
| C26:1                               | 0.090±0.039                        | 0.121±0.39                  |
| B. Fatty acids (pmol/mg tissue)     |                                    |                             |
|                                     | <i>Dgat1<sup>fllox/fllox</sup></i> | <i>hDgat1<sup>-/-</sup></i> |
| <b>Total</b>                        | <b>4822.863 ±1302.241</b>          | <b>8456.95 ±3788.75*</b>    |
| C12                                 | 1.49±0.26                          | 1.60 ±0.28                  |
| C14:1                               | 1.26 ±0.23                         | 1.28 ±0.28                  |
| C14                                 | 5.90 ±2.49                         | 6.41 ±2.08                  |
| C16:1                               | 24.84 ± 7.69                       | 29.66 ±9.76                 |
| C16                                 | 584.15 ±194.14                     | 801.76 ±329.28              |
| C18:3                               | 13.53 ±2.56                        | 16.16 ±4.05                 |
| C18:2                               | 2774.60 ±824.34                    | 5643.45 ± 2841.94*          |
| C18:1                               | 1061.00 ±235                       | 1478.73 ±451.97*            |
| C18                                 | 181.92 ±54.49                      | 280.22 ±113.04*             |
| C20:5                               | 6.90 ±0.94                         | 7.94 ±2.65                  |
| C20:4                               | 54.84 ±13.04                       | 65.61 ±20.79                |
| C20:1                               | 33.18 ±11.07                       | 40.77 ±10.52                |
| C20                                 | 2.195 ± 0.88                       | 2.54 ±0.57                  |
| C22:6                               | 73.46 ±21.76                       | 77.83 ±28.74                |
| C22:1                               | 3.17 ±1.32                         | 2.73 ±0.46                  |
| C22                                 | 0.835 ±0.32                        | 0.768 ±0.20                 |
| C24:1                               | 0.86 ±0.28                         | 0.91 ±0.19                  |
| C24                                 | 0.24 ±0.06                         | 0.21 ±0.06                  |
| C. Fatty acyl-CoAs (pmol/mg tissue) |                                    |                             |
|                                     | <i>Dgat1<sup>fllox/fllox</sup></i> | <i>hDgat1<sup>-/-</sup></i> |
| <b>Total</b>                        | <b>59.68±17.39</b>                 | <b>45.85±12.51</b>          |
| C12                                 | 1.20±0.33                          | 1.13±0.36                   |
| C14:1                               | 3.60 ±1.05                         | 2.79±1.08                   |
| C14                                 | 3.94 ±0.37                         | 3.35±0.88                   |
| C16:1                               | 4.65± 0.81                         | 3.75±1.02                   |

|       |              |              |
|-------|--------------|--------------|
| C16   | 9.10±2.96    | 7.35±2.66    |
| C18:3 | 1.26 ±0.58   | 0.91±0.26    |
| C18:2 | 14.56 ±7.03  | 9.53 ± 2.96  |
| C18:1 | 15.33±4.88   | 12.10±3.44   |
| C18   | 1.48±0.29    | 1.10 ±0.26*  |
| C20:5 | 0.32±0.15    | 0.29±0.13    |
| C20:4 | 1.97±0.45    | 1.77±0.19    |
| C20:1 | 1.57±0.31    | 1.28±0.48    |
| C20   | 0.066± 0.028 | 0.052 ±0.031 |
| C22:6 | 0.60±0.16    | 0.42±0.12    |
| C22:1 | 0.035±0.014  | 0.029 ±0.019 |

**Supplemental Table 2. Heart ceramide measurements in 5- to 6-month-old vehicle or exenatide-treated *hDgat1*<sup>-/-</sup> mice (n=7, \*p<0.05)**

| Ceramides<br>(pg/ g tissue) | <i>hDgat1</i> <sup>-/-</sup> + vehicle | <i>hDgat1</i> <sup>-/-</sup> + exenatide |
|-----------------------------|----------------------------------------|------------------------------------------|
| <b>Total</b>                | <b>8.5509±1.6946</b>                   | <b>6.5173±1.463*</b>                     |
| C14                         | 0.0129±0.0013                          | 0.0097±0.0042                            |
| C16:1                       | 0.7447±0.1506                          | 0.5837±0.1662                            |
| C16                         | 2.457±0.2519                           | 1.9041±0.4545*                           |
| C18:1                       | 0.1903±0.037                           | 0.1612±0.0395                            |
| C18                         | 3.8017±1.0293                          | 2.7325±0.6077*                           |
| C20:1                       | 0.0044±0.002                           | 0.0043±0.0016                            |
| C20                         | 0.0775±0.0314                          | 0.0614±0.0189                            |
| C22:1                       | 0.0181±0.0068                          | 0.0148±0.0046                            |
| C22                         | 0.0898±0.0327                          | 0.064±0.015                              |
| C24:1                       | 0.2417±0.0672                          | 0.1959±0.0586                            |
| C24                         | 0.8981±0.2026                          | 0.7751±0.2075                            |
| C26:1                       | ND                                     | ND                                       |
| C26                         | 0.0128±0.0053                          | 0.0092±0.0047                            |

## Supplemental references

1. Clugston, R. D., Jiang, H., Lee, M. X., Piantedosi, R., Yuen, J. J., Ramakrishnan, R., Lewis, M. J., Gottesman, M. E., Huang, L. S., Goldberg, I. J., Berk, P. D., and Blaner, W. S. (2011) Altered hepatic lipid metabolism in C57BL/6 mice fed alcohol: a targeted lipidomic and gene expression study. *J Lipid Res* **52**, 2021-2031
2. Clugston, R. D., Yuen, J. J., Hu, Y., Abumrad, N. A., Berk, P. D., Goldberg, I. J., Blaner, W. S., and Huang, L. S. (2014) CD36-deficient mice are resistant to alcohol- and high-carbohydrate-induced hepatic steatosis. *J Lipid Res* **55**, 239-246
